# Supplementary material
Source: PubMed Central journal article supplement (PMC4125719)
Supplement: aps201452x1.pdf [file aps201452x1.pdf]

**The proteasome inhibitor, MG132, enhances LDL uptake in HepG2 cells through regulating LDLR and PCSK9 expression: novel roles in cholesterol homeostasis**

Hong Yan<sup>1,2</sup>, Yanling Ma<sup>1,2</sup>, Yuzhou Gui<sup>1,2</sup>, Shumei Wang<sup>1</sup>, Xinbo Wang<sup>1,2</sup>, Fei Gao<sup>1</sup>,  
<sup>2</sup>, Yiping Wang<sup>1</sup>

<sup>1</sup>State Key Laboratory of Drug Research, Shanghai Institute of Materia Medica,  
Chinese Academy of Sciences, Shanghai 201203, China;

<sup>2</sup>Graduate University of Chinese Academy of Sciences, Beijing 100049, China

## SUPPLEMENT FIGURE

**Figure S1**

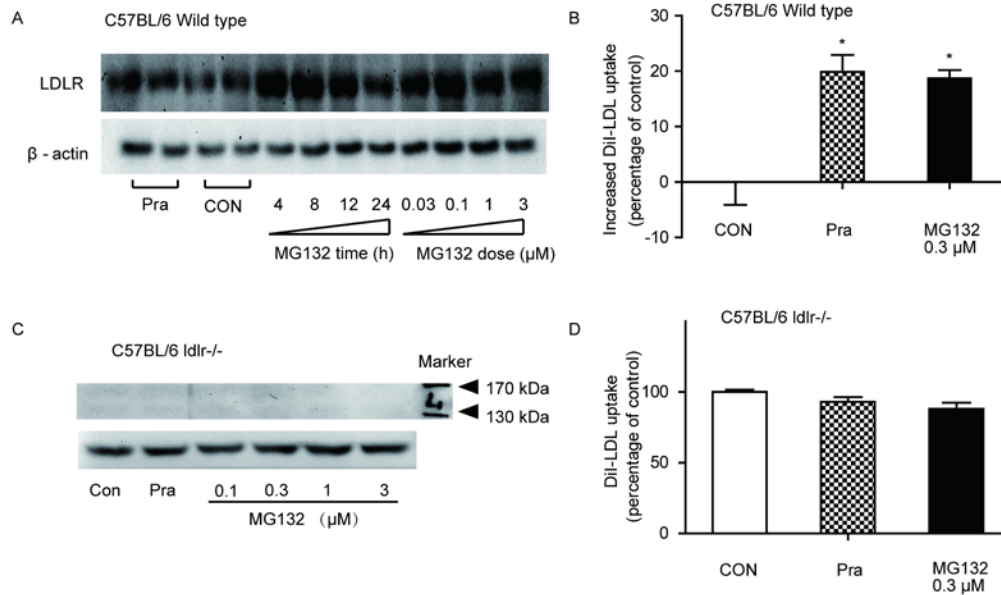

**Figure S1.** Effects of MG132 on LDLR expression and function in primary mouse hepatocytes derived from wild-type or *ldlr*<sup>-/-</sup> C57BL/6 mice. (A, C) Western blot analysis of LDLR expression and (B, D) DiI-LDL uptake in cells treated with MG132 for indicated times and dosages (**Pra**- pravastatin 5  $\mu$ M, positive control). Data are representative of three independent experiments with similar results, and presented as means  $\pm$  SEM. \* $P$ <0.05 vs. vehicle-treated groups.

**Figure S2**

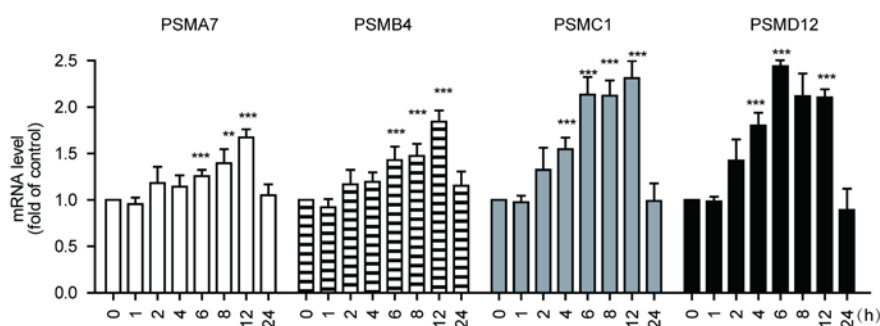

**Figure S2.** Time-curve of mRNA levels of specific proteasome subunits in HepG2 cells treated with MG132 (0.3  $\mu$ M). Primer sequences are listed in Table S1 (**PSMA7**- Proteasome subunit alpha type-7, **PSMB4**- Proteasome subunit beta type-4, **PSMC1**- 26S protease regulatory subunit 4, **PSMD12**- 26S proteasome non-ATPase regulatory subunit 12). Data are presented as means  $\pm$  SEM of three or more independent experiments. \*\* $P < 0.01$ , \*\*\*  $P < 0.001$  vs. vehicle-treated groups.

**Table S1. Sequences of primers used to detect mRNA expression of indicated proteasome subunits**

| gene name     | accession No.  | Primer (5'-3')         | product length (bp) |
|---------------|----------------|------------------------|---------------------|
| <i>PSMA7</i>  | NM_002792.3    | CTGTGCTTTGGATGACAACG   | 149                 |
|               |                | CGATGTAGCGGGTGATGTA    |                     |
| <i>PSMB4</i>  | NM_002796.2    | CTCGTTTCCGCAACATCTCT   | 142                 |
|               |                | TGTCCATCTCCCAGAAGCTC   |                     |
| <i>PSMC1</i>  | XM_005267875.1 | TTCCGAGTTGCTGAAGAACA   | 145                 |
|               |                | ATCCATCCAACACTGGTTCAGC |                     |
| <i>PSMD12</i> | NM_174871.2    | GTGCGCGACTGACTAAAACA   | 158                 |
|               |                | TAGGCAGAGCCTCATTGCT    |                     |

**Figure S3**

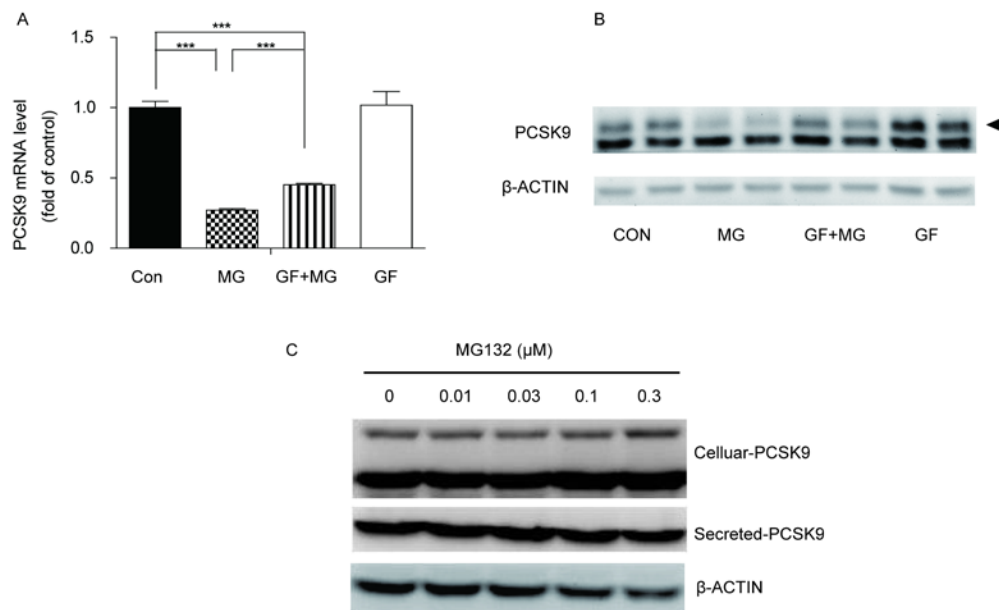

**Figure S3.** (A) Real-time quantification and (B) Western blot analysis of PCSK9 expression in HepG2 cells incubated with MG132 (0.3  $\mu$ M), GF 109203X (5  $\mu$ M), or both for 24 h (black triangle indicates the PCSK9 band). (C) HEK293T cells stably expressing PCSK9-Flag were incubated with increasing concentrations of MG132 (0 to 0.3  $\mu$ M) in DMEM supplemented with 1% FBS for 24 h. PCSK9 protein levels were determined using Western blot. Data are representative of three independent experiments with similar results, and presented as means  $\pm$  SEM. \*\*\* $P$ <0.001 vs. the vehicle treated groups.

**Figure S4**

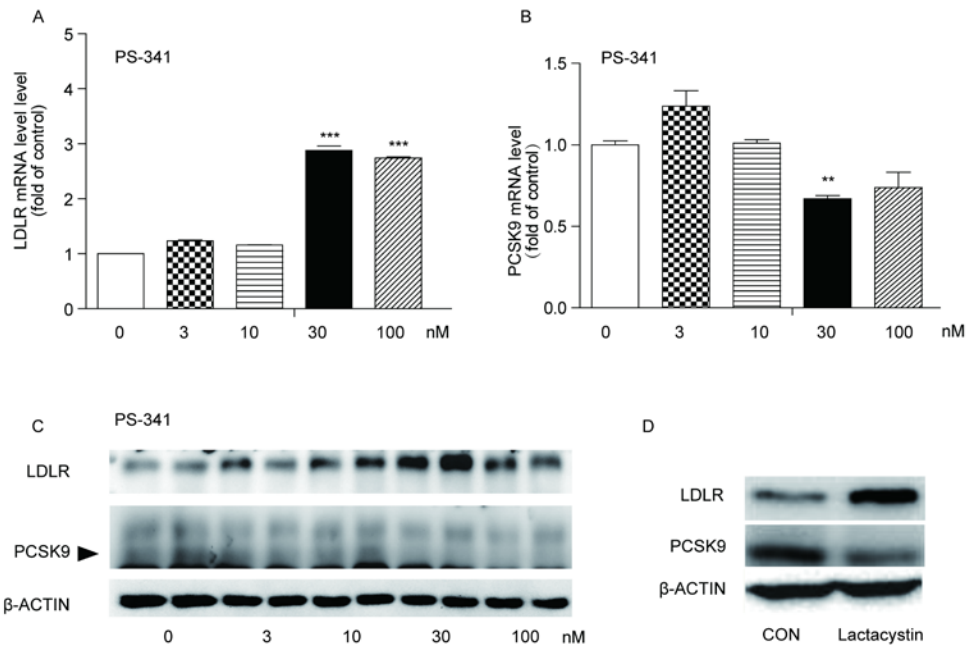

**Figure S4.** Two other proteasome inhibitors upregulate LDLR expression while downregulate PCSK9 expression. (A, B) Real-time PCR quantification of LDLR and PCSK9 mRNA level in HepG2 cells incubated with increasing concentrations of PS-341 for 6 h and 24 h, respectively. (C) Western blot analysis of LDLR and PCSK9 protein levels in HepG2 cells treated with increasing PS-341 (black triangle indicates the PCSK9 band) or 20 nM Lactacystin (D) for 24 h. Data are representative of three independent experiments with similar results. \*\* $P < 0.01$ , \*\*\* $P < 0.001$  vs. the vehicle treated groups.

## Supplementary Methods

### Primary Mouse Hepatocyte

All procedures performed on animals were approved by the Animal Care and Use committee of the Shanghai Institute of Materia Medica, Chinese Academy of Sciences and conformed to the Guide for the Care and Use of Laboratory Animals published by the US National Institutes of Health (8<sup>th</sup> edition, ISBN-13: 978-0-309-15400-0). C57BL/6 mice (20-40 g, male) were anesthetized by pentobarbital (i.p., 200 mg/kg), and primary mouse hepatocytes were isolated by liver perfusion followed by enzymatic digestion and purification on a PBS-Percoll gradient as described with minor modifications.(Li et al., 2010) Hepatocytes were plated at the density of  $3 \times 10^5$  cells per well in a 6-well plate or  $1.5 \times 10^5$  cells per well in a 12-well plate in DMEM/F12 (Hyclone) supplemented with 10% fetal bovine serum and antibiotics. Cells were allowed to attach for 2 hours before switching to low glucose-DMEM (Hyclone) with 2% LPDS and adding all treatments.

Washing medium: HBSS (KCl 0.4, KH<sub>2</sub>PO<sub>4</sub> 0.06, NaHCO<sub>3</sub> 0.35, NaCl 8.0, Na<sub>2</sub>HPO<sub>4</sub>·12H<sub>2</sub>O 0.121, D-glucose 1, g/L) with 0.5 mM EGTA and 25 mM HEPES

Digestion medium: low glucose-DMEM with 100 CDU/ml collagenase (Worthington, U.S.A)

## **REFERENCES**

Li WC, Ralphs KL and Tosh D (2010) Isolation and culture of adult mouse hepatocytes. *Methods in molecular biology* (Clifton, NJ) 633:185-196.
